1  
2  
3  
4  
5  
6  
7  
8  
9  
10  
11  
12  
13  
14  
15  
16  
17  
18  
19  
20  
21

**Linking soil biology and chemistry using  
bacterial isolate exometabolite profiles**

Tami L. Swenson<sup>1</sup>, Ulas Karaoz<sup>2</sup>, Joel M. Swenson<sup>3</sup>,  
Benjamin P. Bowen<sup>1,4</sup>, Trent Northen<sup>1,4\*</sup>

<sup>1</sup>Environmental Genomics and Systems Biology Division, Lawrence Berkeley National Laboratory, 1 Cyclotron Rd, Berkeley, California 94720, USA.

<sup>2</sup>Climate and Ecosystems Sciences Division, Lawrence Berkeley National Laboratory, 1 Cyclotron Rd, Berkeley, California 94720, USA.

<sup>3</sup>Biological Systems and Engineering Division, Lawrence Berkeley National Laboratory, 1 Cyclotron Rd, Berkeley, California 94720, USA.

<sup>4</sup>DOE Joint Genome Institute, 2800 Mitchell Dr., Walnut Creek, California 94598, USA.

*\*Corresponding author: E-mail: TRNorthen@lbl.gov*

22 **ABSTRACT**

23           Sequencing provides a window into microbial community structure and metabolic  
24 potential; however, linking these data to exogenous metabolites that microorganisms  
25 process and produce (the exometabolome) remains challenging. Previously, we  
26 observed strong exometabolite niche partitioning among bacterial isolates from  
27 biological soil crust (biocrust). Here we examine native biocrust to determine if these  
28 patterns are reproduced in the environment. Overall, most soil metabolites displayed the  
29 expected relationship (positive or negative correlation) with four dominant bacteria  
30 following a wetting event and across biocrust developmental stages. For metabolites  
31 that were previously found to be consumed by an isolate, 78% were negatively  
32 correlated with the abundance of *in situ* isolate phlotypes whereas for released  
33 metabolites, 73% were positively correlated. Our results demonstrate that metabolite  
34 profiling, sequencing and exometabolomics can be successfully integrated to  
35 functionally link metagenomes and microbial community structure with environmental  
36 chemistry.

37

38           In soils, which harbor the largest terrestrial pool of organic carbon<sup>1</sup>, organic  
39 matter is largely processed by complex microbial communities. The impact of climate  
40 change on these communities and their activities is uncertain<sup>2</sup>. Given the importance of  
41 these systems, vast amounts of sequencing data have been and continue to be  
42 collected. While metagenomic sequencing provides important insights into community  
43 structure and metabolic potential, if unconstrained, such data are often open to multiple  
44 interpretations. New approaches are needed to help link the now readily available  
45 sequencing data to *in situ* metabolism in order to better understand the dynamic  
46 reciprocity between carbon cycling and microbial community structure.

47           Soil organic matter (SOM) content and moisture have long been recognized as  
48 important factors controlling soil microbial community structure and carbon cycling<sup>3,4</sup>.  
49 For example, microbial community diversity and richness are positively correlated with  
50 soil organics across diverse ecosystems including polar soils<sup>5</sup>, agricultural soils<sup>6</sup> and  
51 arid soils<sup>7</sup>. Similarly, soil wetting events are well-known to dramatically alter community  
52 structure<sup>8</sup> including establishing cascades of microbial abundances<sup>9</sup>. Arid lands account  
53 for over 40% of Earth's terrestrial surface<sup>10</sup> and are especially sensitive to SOM and  
54 moisture content. It is predicted that the aridity of drylands will increase, reducing SOM  
55 and microbial community diversity, and that this will impact ecosystem productivity<sup>7,11</sup>.  
56 This strong coupling between soil moisture, SOM and community structure is especially  
57 important in the arid land topsoil microbial communities known as biological soil crusts  
58 (biocrusts), which cover a large fraction of arid regions and are critical in nutrient  
59 cycling<sup>12</sup>. Biocrusts exist in a dormant desiccated state and only become metabolically

60 active during infrequent rainfall events<sup>13</sup> and like other soils, organic matter plays a vital  
61 role in retaining moisture and increasing microbial diversity<sup>14</sup>.

62 The mechanisms linking SOM composition and microbial community structure  
63 are poorly understood. It is now thought that the organic matter that is cycled by soil  
64 microbes is a complex mixture of microbial metabolites<sup>15,16</sup> that can be characterized in  
65 detail using soil metabolomics<sup>17,18</sup>. The composition of these exometabolites has a large  
66 impact on community structure, and in turn, these microbes impact the metabolite pool.  
67 For example, in some cases, resource competition can reduce diversity through  
68 competitive exclusion, whereas cross-feeding can increase diversity. On the other hand,  
69 rich sources of SOM may promote diversity through niche divergence<sup>19</sup> and  
70 exometabolite niche partitioning<sup>20</sup>.

71 Exometabolomics enables direct examination of how microbes transform the  
72 small molecule metabolites within their environment, providing new insights into  
73 resource competition and cross-feeding<sup>21</sup>. For this approach, microbes (typically  
74 isolates) are cultured in an environmentally-relevant mixture of metabolites and then  
75 spent media is profiled to determine the uptake and release of metabolites. Recently,  
76 exometabolomics was used to study resource partitioning among sympatric biocrust  
77 isolates using complex media<sup>20</sup>. This revealed a high degree of substrate specialization  
78 where 13-26% of the detected metabolites were consumed by individual isolates. As  
79 organisms from diverse taxa continue to be cultivated and examined, this approach  
80 holds substantial potential to provide valuable phenotypic information that can link  
81 community structure to SOM composition.

82           Here we explored the dynamics and relationships between biocrust microbes and  
83 metabolites. We then determined the extent to which isolate exometabolite patterns are  
84 conserved *in situ* (within the intact soil community). Microbe-metabolite changes were  
85 driven by wetting dry biocrusts obtained along an ecological successional gradient  
86 (Figure 1A). Four successional stages of biocrust were used, ranging from early/ young  
87 (labeled as 'level A') to late/ mature (labeled as 'level D') (Supplementary Figure 1). We  
88 then compared our current results with previous laboratory-derived knowledge of  
89 substrate preferences for four dominant organisms by relating the abundance of these  
90 bacteria to soil metabolites measured in the intact biocrust system (Figure 1B). While  
91 the comparison of a microbe in isolation and in an environmental system is complex, the  
92 general assumption is that as a particular microbe grows and increases in abundance in  
93 a community, consumed metabolites will decrease and display a negative-correlation  
94 relationship. Conversely, metabolites that are known to be released by a microbe are  
95 predicted to concurrently increase and display a positive-correlation relationship with  
96 growth (Figure 1B). Liquid chromatography-mass spectrometry (LC/MS) soil  
97 metabolomics was used to characterize the dynamic composition of the biocrust soil  
98 water and shotgun metagenomic sequencing was used to measure single copy gene  
99 markers of the dominant taxa. To the best of our knowledge, this is the first study using  
100 isolate exometabolomics to link microbial community structure to soil chemistry.

101

102

## 103 **RESULTS**

### 104 ***Cycling of metabolites and microbes across wetting and successional stages***

105       The metabolic activity caused by wetting was monitored at various time points  
106 ranging from immediate (3 min) to long-term (49.5 h) across the four biocrust  
107 successional stages. Biocrust soil water was analyzed by LC/MS, resulting in the  
108 identification of 85 metabolites using authentic chemical standards (Figure 2 and  
109 Supplementary Table 1). All metabolites displayed cycling by changing at least two-fold  
110 (between minimum and maximum peak areas) across both wetting and successional  
111 stages (Figure 2). Wetting duration had a stronger impact on metabolite dynamics  
112 compared to changes in successional stages (Supplementary Figure 2). Hierarchical  
113 clustering of metabolite patterns revealed three distinct clusters (Figure 2). The first  
114 cluster (cluster 1, Figure 2) consisted of most (5 out of 7) of the detected fatty acids  
115 (palmitate, myristate, stearate, laurate, decanoate), which were most abundant at the  
116 first time point (3 min) for all successional stages, and gradually decreased with time.  
117 The largest cluster (cluster 2, Figure 2) was enriched with the majority of amino acids  
118 and nucleobases, which peaked in abundance at the early to early-mid time points.  
119 Within this cluster, the earliest metabolites included polar amino acids (glutamine,  
120 glutamate, asparagine, 4-oxoproline, aspartate and lysine) and the nucleobases uridine,  
121 guanosine and cytidine. The final cluster (cluster 3 in Figure 2) contained metabolites  
122 most abundant at late time points and in more mature biocrust (e.g. salicylate,  
123 panthothenate, nicotinate, xanthine, creatinine).

124       Microbial community structure was determined using shotgun metagenomics with  
125 a genome-centric analysis pipeline. The relative abundances of environmental genomes

126 were determined via read-mapping to a universal single-copy phylogenetic marker  
127 gene, *rpI*O (ribosomal protein L15)<sup>22</sup>. This approach has proven useful in several reports  
128 for examination of community structure via shotgun sequencing that often results in  
129 poor 16S ribosomal RNA gene assemblies<sup>23-25</sup>. Based on *rpI*O genes, 466 distinct  
130 organisms were identified in the biocrust across all conditions (Supplementary Table 2).  
131 As observed for biocrust metabolites, community structure was primarily driven by time  
132 since wetting. At the phylum level, the most drastic change was a shift from a  
133 cyanobacteria-dominated community at early time points (17-28% at 3 min to 1-3% by  
134 49.5 h) to a Firmicutes-dominated community by 49.5 h (4-5% at 3 min to 19-39% by  
135 49.5 h) (Supplementary Figure 3). Other dominant phyla included Proteobacteria and  
136 Actinobacteria, which appeared to be indifferent to wetting (*i.e.* their relative abundance  
137 was more evenly-distributed across wetting) (Supplementary Figure 3).

138 In order to use previous exometabolomic studies to link soil microbe-metabolite  
139 abundances in biocrust, *rpI*O gene sequences of the profiled biocrust bacterial isolates<sup>20</sup>  
140 were compared to all *rpI*O genes obtained from biocrust. With this approach, we  
141 identified four relatively abundant isolate-related phylotypes in the biocrust that were  
142 selected for further analyses and exometabolomics comparisons: *Microcoleus* spp. (a  
143 filamentous Cyanobacterium and primary producer), two Firmicutes (referred to here as  
144 *Anoxybacillus* sp. and *Bacillus* sp.) and *Blastococcus* sp. (an actinobacterium) (Table 1,  
145 Supplementary Figure 4). *Microcoleus* spp. is known to be a pioneer species  
146 responsible for initial soil stabilization and biocrust formation<sup>26</sup> and in our study was the  
147 most dominant in early wetup biocrust, accounting for 10-25% of the entire microbial  
148 community at 3 min across all successional stages (Supplementary Figure 5). The two

149 Firmicutes, *Anoxybacillus* sp. and *Bacillus* sp., are likely to be physically-associated with  
150 *Microcoleus* filaments<sup>20</sup> and their relative abundance increased during wetting. The  
151 most abundant of these, *Anoxybacillus* sp., was a mid-wetup responder and peaked at  
152 9 h for successional levels A, B and D (16-24% of the community) and at 18 h for  
153 successional level C (24% of the community) (Supplementary Figure 5). *Bacillus* sp.  
154 reached its peak abundance at later time points, accounting for up to 3% of the  
155 community by 42 h in successional level C (Supplementary Figure 5), noting that by the  
156 later time points the community was less dominated by any one particular organism  
157 (Supplementary Figure 5). Finally, *Blastococcus* sp. abundance was found to be  
158 relatively resistant to wetting and was somewhat evenly distributed across all conditions  
159 (0.1-2% of the community) (Supplementary Figure 5).

160

### 161 ***Linking microbe-metabolite abundances based on isolate exometabolomics*** 162 ***profiling***

163 To determine how isolate substrate preferences impacted *in situ* exometabolite  
164 composition, we evaluated microbe-metabolite correlations, focusing on metabolites  
165 known to be released or consumed by the related isolates of *Microcoleus* spp.,  
166 *Anoxybacillus* sp., *Bacillus* sp. and *Blastococcus* sp. The expectation was that released  
167 metabolites would be positively correlated with the relative bacterial abundance while  
168 consumed metabolites would be negatively correlated (Figure 1B) across both wetting  
169 and successional stage. To link previous isolate exometabolomics data with the current  
170 biocrust exometabolome dataset (Figure 2), we determined the degree of correlation  
171 between the metabolites that were previously found to be consumed and released by



172 biocrust isolates<sup>20</sup> and the four relatively-abundant bacteria of interest found in the  
173 biocrust (*Microcoleus* spp., *Anoxybacillus* sp., *Bacillus* sp. and *Blastococcus* sp). Of the  
174 85 metabolites identified in the biocrust soil water, 32 matched the isolate  
175 exometabolome dataset (Supplementary Table 3).

176 To assess the directionality (positive versus negative correlations) of predicted  
177 soil microbe-metabolite relationships, we performed Spearman's rank correlation  
178 analyses. We then used an exact binomial test to evaluate the possibility that the  
179 correct directionality could occur by chance (Supplementary Table 4). Strikingly, of the  
180 71 microbe-metabolite relationships evaluated (Supplementary Figure 6), 76% had the  
181 predicted directionality and would be very unlikely to occur by chance (two-tailed p-  
182 value < 1 x 10<sup>-5</sup>; Supplementary Table 4).

183 We next used our data to hypothesize a dynamic exometabolomic web of  
184 microbes, largely reflecting the release of metabolites by the primary producer  
185 (*Microcoleus* spp.) followed by consumption by the two heterotrophs that displayed a  
186 large degree of cycling across wetting (*Anoxybacillus* sp. and *Bacillus* sp.) (Figure 3).  
187 *Blastococcus* sp. is not shown in Figure 3 since this organism did not drastically change  
188 across time and to simplify visualization of the network. Of the large set of metabolites  
189 that were most highly-released by *M. vaginatus* PCC 9802<sup>20</sup>, 20 of these were detected  
190 in the biocrust soil water and most (65%) were positively correlated with *Microcoleus*  
191 spp. (Figure 3 and Supplementary Figure 6) across wetting and successional stages.  
192 While *Microcoleus* spp. was most abundant immediately following wetting, most of  
193 these metabolites (80%) reached their highest level during the first three time points (3

194 min, 9 h or 18 h) just after the *Microcoleus* spp. spike, suggesting release by  
195 *Microcoleus* spp. followed by increasing consumption by heterotrophs.

196 Consistent with a heterotrophic lifestyle, metabolites were primarily negatively  
197 correlated with the abundances of *Anoxybacillus* sp., *Bacillus* sp. and *Blastococcus* sp.  
198 Of the metabolites that were consumed by the *Anoxybacillus* sp.- related isolate, D1B51  
199 (Table 1)<sup>20</sup>, 12 were detected in the current biocrust soil water samples and reached  
200 their highest level early-on (at either 3 min, 9 or 18 h), decreasing just after the peak in  
201 *Anoxybacillus* sp. Nine of these metabolites were negatively correlated with  
202 *Anoxybacillus* sp., consistent with metabolite consumption, and all four D1B51-released  
203 metabolites were positively correlated with *Anoxybacillus* sp. (Figure 3 and  
204 Supplementary Figure 6). As for the less dominant organisms, the late-wetup  
205 responder, *Bacillus* sp., was negatively correlated with all 10 metabolites that were  
206 consumed by the related isolate (L2B47) and positively correlated with 4 out of 5  
207 isolate-released metabolites (Figure 3 and Supplementary Figure 6). Furthermore,  
208 *Blastococcus* sp., was negatively correlated with 13 out of the 15 metabolites that were  
209 consumed by the related isolate (L1B44), while a single isolate-released metabolite was  
210 positively correlated (tryptophan; Supplementary Figure 6). Finally, the closest biocrust  
211 phylotypes of the three remaining exometabolomic-profiled isolates (L1B56, D1B2 and  
212 D1B45) accounted for 0.1% or less of the microbial community in our metagenomes  
213 and thus, not surprisingly, did not display exometabolite-based microbe-metabolite  
214 relationships (data not shown).

215

216 **Transcriptomics support the link between soil microbes and metabolites**

217 Transcriptomics has the potential to test if gene expression is consistent with the  
218 predicted substrate utilization and release. As an initial proof of concept, we further  
219 analyzed data obtained from a previous study that evaluated *M. vaginatus* gene  
220 expression following wetup and drydown in biocrusts obtained from the same field  
221 site<sup>27</sup>. We found that pathways involved in the biosynthesis of amino acids (KEGG  
222 pathways 'biosynthesis of amino acids', 'phenylalanine, tyrosine and tryptophan  
223 biosynthesis' and 'valine, leucine and isoleucine biosynthesis') all increased  
224 dramatically during early wet-up (Supplementary Figure 6, Supplementary Table 5). In  
225 contrast, pathways involved in the degradation of these same metabolites were  
226 relatively constant ('phenylalanine metabolism') or only slightly increased ('tryptophan  
227 metabolism' and 'valine, leucine and isoleucine biosynthesis') following wet-up  
228 (Supplementary Figure 7) consistent with the early-increase of most amino acids in  
229 biocrust soil water in the present study and the release of these metabolites by *M.*  
230 *vaginatus* PCC 9802<sup>20</sup>.

231

## 232 **DISCUSSION**

233 Sequencing has the potential to link exometabolite composition to specific  
234 microbes based on genome annotations. However, based on these data alone, relating  
235 metabolic potential to activity is challenging. Despite this, sequencing and other  
236 approaches have started to shed light on the impact individual organisms<sup>28</sup>, microbial  
237 genes<sup>29</sup> and enzymatic activities<sup>30</sup> have on the chemistry within their environment. Here,  
238 we evaluated exometabolite profiles of individual bacteria for linking soil metabolites to

239 bacteria in biocrust, a critical ecosystem that lends itself to studies of community  
240 responses to soil wetting.

241 We found that a wetting event set in motion an immediate cascade of microbial  
242 activities marked by a drastic shift in community structure. The dominance of  
243 Cyanobacteria during early time points is consistent with previous reports<sup>31</sup> as is the  
244 subsequent Firmicutes-bloom<sup>9,32</sup>. The Firmicutes phylum consists mostly of gram-  
245 positive, spore-forming bacteria with rapid generation times, enabling them to ‘bloom’  
246 upon soil wetting<sup>33,34</sup>. The observed switch from a Cyanobacteria-dominated community  
247 to a Firmicutes-dominated community (mostly *Anoxybacillus* sp. in this study) agrees  
248 with our observations of metabolite release by the dominant photoautotroph  
249 (*Microcoleus* spp.)<sup>20</sup> followed by consumption and growth of diverse heterotrophs (e.g.  
250 Firmicutes), possibly including symbiotic nitrogen-fixers<sup>35</sup>. While we did not observe  
251 evidence of fixed nitrogen transfer into Cyanobacteria, this process may occur during  
252 dry-down, when nitrogen-rich nutrients may be released upon the mother cell lysis stage  
253 of sporulation<sup>36</sup>.

254 It has been suggested that copiotrophic organisms (e.g. many Firmicutes) are  
255 superior competitors for a limited number of compounds whereas oligotrophs (e.g. many  
256 Actinobacteria) support a more stable population by using a wider range of substrates<sup>37</sup>.  
257 Our previous exometabolomics work is consistent with this view and showed that the  
258 two Firmicutes isolates depleted the narrowest range of substrates (10%) whereas the  
259 two Actinobacteria used almost twice as many<sup>20</sup>. Here we find that unlike the boom-bust  
260 cycle of Firmicutes, the Actinobacteria phylum (such as *Blastococcus* sp.) may be more  
261 resistant to wetting. This provides limited evidence that utilization of diverse substrates,

262 consistent with oligotrophy, may enable slow but continuous growth under conditions  
263 with highly dynamic exometabolite pools.

264         The community dynamics that were caused by biocrust wetting resulted in strong  
265 microbe-metabolite relationships that were conserved from one successional stage to  
266 another for the four bacteria of interest (*Microcoleus* spp., *Anoxybacillus* sp., *Bacillus*  
267 sp. and *Blastococcus* sp.) (Supplementary Figure 8). This supports the notion that the  
268 water-soluble SOM in these biocrusts, to a large degree, originates from and is  
269 controlled by microbes<sup>15</sup> and the composition of this pool may be predictable if a change  
270 in microbial community structure is anticipated. This finding has particular significance  
271 for biocrusts, since changes in temperature and rainfall are expected to shift microbial  
272 community structure<sup>38,39</sup>. As a result, these alterations are expected to impact SOM  
273 cycling especially if there is loss of taxa responsible for utilization or production of  
274 specific SOM components.

275         Next, we explored the connection between the observed microbe-metabolite  
276 relationships in biocrust and culture-based exometabolite profiles. Overall, we found  
277 that isolate exometabolomic patterns were conserved in the intact biocrust soil microbial  
278 community. The expected directionality (positive or negative microbe-metabolite  
279 correlations) (solid arrows in Figure 3) was significantly higher than predicted by  
280 chance, indicating a linkage between laboratory observations and *in situ* soil activities.  
281 While most metabolites displayed the expected patterns, some biocrust soil water  
282 metabolites (*i.e.* uracil, N6-acetyl-lysine, hypoxanthine and xanthine) were inconsistent  
283 with *M. vaginatus* PCC 9802 exometabolite profiles. However, these were also released  
284 by and positively correlated with *Bacillus* sp. Deconvoluting this may be possible using

285 dynamic utilization models<sup>40,41</sup> to account for the relative contributions of the two  
286 organisms. Ultimately, this same approach could be used to account for rare community  
287 members that may also have an impact on the exometabolite pool or may alter the  
288 metabolism of other microbes<sup>42,43</sup>. Although outside of the scope of the current work, we  
289 anticipate that these substrate-genome linkages could be further tested and refined by  
290 using other approaches. Stable isotope probing coupled with labeled DNA  
291 sequencing<sup>35,44</sup> and integrated NanoSIMS and FISH imaging<sup>45,46</sup> may be used to  
292 examine the spatial localization of microbes and their activities.

293 We next used the biocrust microbe-metabolite relationships to postulate a  
294 dynamic exometabolomics web describing the wetting response of three dominant  
295 bacteria in the biocrust (Figure 3). This network displays the release of many  
296 metabolites, especially amino acids, by *Microcoleus* spp. followed by consumption by  
297 the two heterotrophic Firmicutes. This suggests unique organismal roles in the biocrust  
298 foodweb including the preferential consumption of aromatic amino acids (tryptophan  
299 and phenylalanine) by *Anoxybacillus* sp. and branched-chain amino acids (leucine and  
300 isoleucine) by both Firmicutes. Interestingly, we also observe that these Firmicutes  
301 release nucleobases (uracil, hypoxanthine and xanthine), consistent with our earlier  
302 reports of heterotrophs releasing these compounds<sup>47</sup>. This may reflect a nitrogen-  
303 scavenging mechanism by consuming N-containing substrates (cytosine, adenine,  
304 guanine and histidine), producing uracil, hypoxanthine, xanthine and urocanate as  
305 byproducts. Knowledge of these functional linkages between metabolites and microbes  
306 has the potential to help understand and predict nutrient cycling in terrestrial microbial  
307 ecosystems<sup>48</sup> analogously to the many organisms that have been linked to specific

308 transformations within marine ecosystems. For example Cyanobacteria release and  
309 reuptake organic carbon<sup>49</sup>, a variety of uncultured taxa utilize dissolved proteins<sup>44</sup> and  
310 SAR11 bacteria assimilate amino acids and dimethylsulfoniopropionate<sup>50</sup>.

311 We attribute much of the success of this study to the suitability of the biocrust  
312 ecosystem. One such advantage is that biocrust soil in this study is primarily quartz  
313 sand, facilitating metabolite analysis compared to many other soils which are typically  
314 rich in clays and other strongly-sorptive mineral surfaces<sup>51</sup>. Accurately representing the  
315 competition between microbes and mineral surfaces would require additional studies  
316 examining mineral-metabolite sorption dynamics<sup>52,53</sup>. Another relatively simplifying  
317 factor is that the biocrust community, unlike many other soils, is dominated by a few  
318 bacteria, greatly enabling accurate correlations between taxa and metabolites.  
319 Furthermore, there is a general lack of consensus of isolate-to-community comparisons  
320 and what constitutes a valid comparison especially with the use of ribosomal protein  
321 genes as phylogenetic markers. Exometabolite-profiled isolates and their related  
322 biocrust phylotypes ranged between 86.3-92.0% identical in their *rp10* sequence (Table  
323 1), likely placing them in the same genus, and with more certainty, the same family.  
324 Despite the low taxonomic resolution, the observed functional similarity, agrees with  
325 reports suggesting that metabolic traits are largely conserved at the phylum level<sup>54</sup>. We  
326 anticipate that in order to accurately predict microbe-metabolite relationships for more  
327 diverse communities and complex environments, a large number of relevant taxa would  
328 need to be subjected to exometabolite profiling. Accounting for switching between  
329 metabolic states will require profiling under diverse environmental conditions. For  
330 example, the discrepancy between metabolites that were released by *M. vaginatus* PCC

331 9802<sup>20</sup>, but were not correlated with *Microcoleus* spp. abundance in the present study  
332 may be due to different metabolic processes occurring during the day (photosynthesis)  
333 versus night (respiration) (Diel cycle)<sup>27,55</sup>. Thus, modeling approaches will be required to  
334 account for metabolic state switching among other processes. One exciting possibility of  
335 expanded exometabolomic datasets, is that knowledge of uptake and release of  
336 metabolites can be used as boundary constraints for flux-balance analysis<sup>56</sup> and trait-  
337 based models<sup>57</sup> providing a genome-scale approach for linking soil metabolites with  
338 metagenomic data. For example, OptCom<sup>58</sup>, a multi-level and multi-objective flux  
339 balance analysis framework to understand metabolism within microbial communities,  
340 which currently primarily relies on genomic information, could be used in conjunction  
341 with exometabolomic data.

342         In conclusion, this study shows that isolate exometabolite patterns are conserved  
343 within an intact biocrust community, relating community structure and metabolite  
344 composition. We expect that exometabolomic characterization of additional taxa and  
345 determination of mineral-metabolite sorption dynamics, under a range of  
346 environmentally relevant conditions (e.g. day/night cycles), integrated with modeling  
347 approaches will further enhance the predictive power of these relationships. These  
348 studies may help pave the way for interpretation and use of metagenomic and  
349 metatranscriptomic approaches for linking soil chemistry to soil microbiomes to define  
350 exometabolite webs of microbes in complex ecosystems.

351

352



353 **MATERIALS AND METHODS:**

354 ***Materials***

355 LC/MS-grade water and LC/MS-grade methanol (CAS 67-56-1) were from  
356 Honeywell Burdick & Jackson (Morristown, NJ). LC/MS-grade acetonitrile (CAS 75-05-  
357 8) and ammonium acetate (CAS 631-61-8) were from Sigma-Aldrich (St. Louis, MO).  
358 LC/MS internal standards included MOPS (CAS 1132-61-2), HEPES (CAS 7365-45-9),  
359 3,6-dihydroxy-4-methylpyridazine (CAS 5754-18-7), 4-(3,3-dimethyl-ureido)benzoic acid  
360 (CAS 91880-51-2), d<sub>5</sub>-benzoic acid (CAS 1079-02-3) and 9-anthracenecarboxylic acid  
361 (CAS 723-62-6) from Sigma-Aldrich.

362

363 ***Sample collection***

364 Petri dishes (6 cm<sup>2</sup> x 1 cm depth) were used to core biocrust samples from the  
365 Green Butte Site near Canyonlands National Park (38°42'54.1"N, 109°41'27.0"W,  
366 Moab, UT, USA). Samples were collected along an apparent maturity gradient of  
367 Cyanobacteria-dominated biocrusts ranging from light, young (level A) to darker, more  
368 mature (level D) (Supplementary Figure 1). Samples were air-dried in the field and  
369 brought back to the laboratory where they were maintained in a dark desiccation  
370 chamber.

371

372 ***Biocrust wetting***

373 Biocrust (0.5 g) was transferred to each well within 12-well plates. Sterile LC/MS-  
374 grade water (1 mL) was added to each sample and placed under a 12 h light (~300  
375  $\mu\text{mol photons/m}^2\text{s}$ ) / 12 h dark cycle. Microcosms were completely enclosed by

376 aluminum foil to prevent infiltration by outside light sources. At each time point (3 min, 9  
377 h, 18 h, 42 h and 49.5 h), biocrust and soil water were removed and placed in 2 mL  
378 Eppendorf tubes and 500  $\mu$ L of additional water was used to rinse out the wells and  
379 added to the sample. Tubes were centrifuged at 5000 x *g* for 5 min and supernatant  
380 (biocrust soil water) was pipetted and placed in new 2 mL tubes. Remaining biocrust  
381 was stored at -80°C until nucleic acid extraction was performed. There were five  
382 replicates, five time points and four successional stages of crust resulting in 100 total  
383 samples.

384

### 385 ***Metabolite extraction and LC/MS analysis***

386 Biocrust soil water samples (1.5 mL) were lyophilized and resuspended in  
387 methanol (200  $\mu$ L) containing internal standards (2-10  $\mu$ g/mL) and filtered through 96-  
388 well Millipore filter plates (0.2  $\mu$ m PVDF) by centrifuging at 1500 x *g* for 2 min. Samples  
389 were analyzed using normal-phase LC/MS with a ZIC-pHILIC column (150 mm  $\times$  2.1  
390 mm, 3.5  $\mu$ m 200 Å, Merck Sequant, Darmstadt, Germany) using an Agilent 1290 series  
391 UHPLC (Agilent Technologies, Santa Clara, California, USA). Chromatographic  
392 separation was achieved using two mobile phases, 5 mM ammonium acetate in water  
393 (A) and 90% acetonitrile w/ 5 mM ammonium acetate (B) at a flow rate of 0.25 mL/min  
394 with the following gradient: 100% B for 1.5 min, linear decrease to 50% B by 25 min,  
395 held until 29.9 min then returned to initial conditions by 30 min with a total runtime of 40  
396 min. Column temperature was maintained at 40°C. For MS, negative mode data were  
397 acquired on an Agilent 6550 quadrupole time-of-flight mass spectrometer and positive  
398 mode data were acquired on a Thermo QExactive (Thermo Fisher Scientific, Waltham,

399 MA). Fragmentation spectra (MS/MS) were acquired for some metabolites using  
400 collision energies of 10-40 eV.

401 Metabolomics data were analyzed using Metabolite Atlas<sup>59</sup> in conjunction with  
402 the Python programming language. Internal standards were assessed from each  
403 sample to ensure peak area and retention times were consistent from sample-to-  
404 sample. Quality control mixtures were included at the beginning, end and throughout the  
405 runs to ensure proper instrument performance (*m/z* accuracy and retention time and  
406 peak area stability). Sample QC failed for some replicates including all 9 h wetup level D  
407 samples and were not included for further analyses. Metabolite identifications were  
408 based on two orthogonal data relative to authentic standards and/or the Metlin  
409 database<sup>60,61</sup> and are provided in Supplementary Table 1. Putative identifications were  
410 assigned in the cases where these criteria were not met and are indicated by  
411 parentheses in figures. To explore the degree of variation in biocrust metabolite profiles  
412 across wetting and successional stages, biocrust samples were PCA-ordinated based  
413 on their metabolite profiles.

414

#### 415 ***DNA extraction, sequencing and microbial annotation***

416 DNA was extracted from biocrust (0.25 g) using the MoBio Powersoil DNA  
417 isolation kit (MoBio Laboratories, Inc, Carlsbad, CA) resulting in 100 uL of eluted DNA.  
418 Library preparation and sequencing were done at the QB3 facility at the University of  
419 California, Berkeley using Illumina HiSeq4000 (see supplementary methods for details  
420 on metagenome analysis). In recent studies<sup>23-25</sup>, ribosomal protein genes have been  
421 used as phylogenetic markers as an alternative to the more classical 16S ribosomal

422 RNA gene. Ribosomal protein genes exist as single copies in almost all genomes,  
423 assemble well from metagenome datasets, are well-conserved and have produced  
424 higher resolution phylogenetic trees<sup>23</sup>. Given these advantages, the 50S ribosomal  
425 protein L15 (*rpL15*) gene was well-represented in our metagenomes and was therefore  
426 used as a phylogenetic marker to examine the relative abundance of individual  
427 organisms within the microbial community across wetting and successional stages. The  
428 *rpL15* genes from the genomes of the seven exometabolite profiled biocrust bacterial  
429 isolates<sup>20</sup> were compared to all the *rpL15* genes recovered from biocrust. Those with the  
430 highest percent similarity were considered the “closest relatives” to the isolates and are  
431 reported in Table 1.

432

### 433 ***Microbe-metabolite correlations and statistics***

434 Correlations were used to identify microbe-metabolite relationships across both  
435 wetting and successional stages. Spearman’s rank (*rho*) correlation coefficients for  
436 every pairwise (microbe-metabolite) relationship and p-values (unadjusted and FDR-  
437 adjusted) were calculated using the `cor()` stats function in R. A Spearman’s *rho* value  
438 greater than or equal to 0.5 was considered “highly correlated” and less than or equal to  
439 -0.5 was considered “highly negatively correlated”. To test if the overall observed  
440 directionality (positive versus negative correlations) was due to chance rather than as  
441 would be predicted based on exometabolomics (release versus consumption), the exact  
442 binomial test was conducted using R (`binom.test`) with a total of 71 “trials” or observed  
443 microbe-metabolite interactions (Supplemental table 4).

444

#### 445 ***Exometabolomics comparison and analysis***

446           Of the 85 metabolites detected in biocrust soil water, 32 were previously  
447 analyzed for consumption and release by biocrust isolates<sup>20</sup>. For continued analyses of  
448 those data here, fold-change was calculated by dividing the average peak area of each  
449 metabolite in (isolate) inoculated spent media by the non-inoculated control spent media  
450 (raw data can be found in the Supplemental Table in Baran et al, 2015). A metabolite  
451 was considered consumed if the fold-change was 0.5 or less and released metabolites  
452 had a fold-change of 2 or greater.

453

#### 454 ***Microcoleus gene expression analysis***

455           *Microcoleus* genes from Supplementary Table S6 from Rajeev et al (2013) were  
456 categorized into KEGG pathways (for genes containing KEGG ID numbers). Analyses  
457 focused on pathways that are primarily anabolic or catabolic for metabolites that were  
458 released by *Microcoleus* PCC 9802. The average fold-change (relative to dry biocrusts)  
459 and standard errors were calculated for all genes belonging to pathways of interest.

460

#### 461 **ACKNOWLEDGEMENTS**

462           This work was funded by the Office of Science Early Career Research Program,  
463 Office of Biological and Environmental Research, of the U. S. Department of Energy  
464 under contract number DE-AC02-05CH11231. DNA was sequenced using the Vincent  
465 J. Coates Genomics Sequencing Laboratory at UC Berkeley, supported by NIH S10  
466 OD018174 Instrumentation Grant. We thank Rebecca Lau for technical assistance in  
467 biocrust sample collection and experimentation.

468

469 **AUTHOR CONTRIBUTIONS**

470 T.L.S. and T.R.N. conceived the study, designed the experiments and wrote the  
471 manuscript. T.L.S. performed the experiments. T.L.S. and B.P.B. analyzed the  
472 metabolomics data. U.K. analyzed the metagenomics data. T.L.S. and J.M.S.  
473 conducted correlation and statistical analyses. All co-authors commented on the design  
474 of experiments, data analysis and draft manuscripts.

475

476

477 **FIGURES AND TABLES**

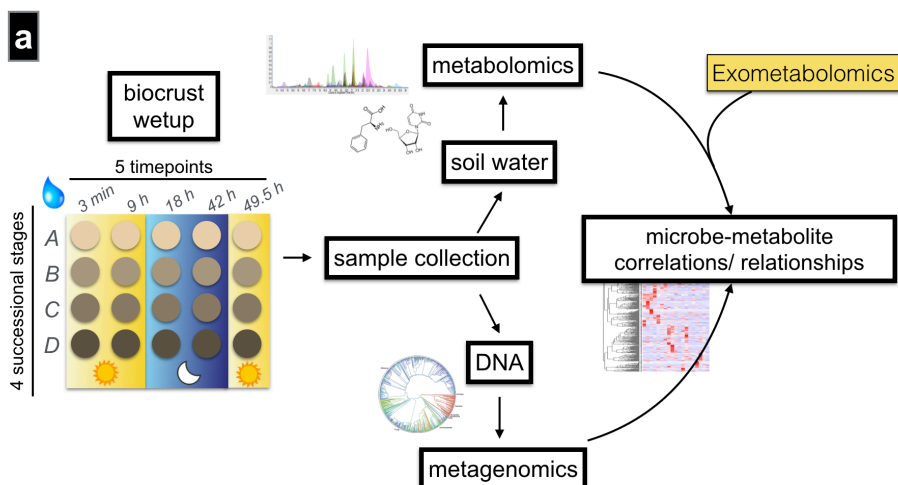

478

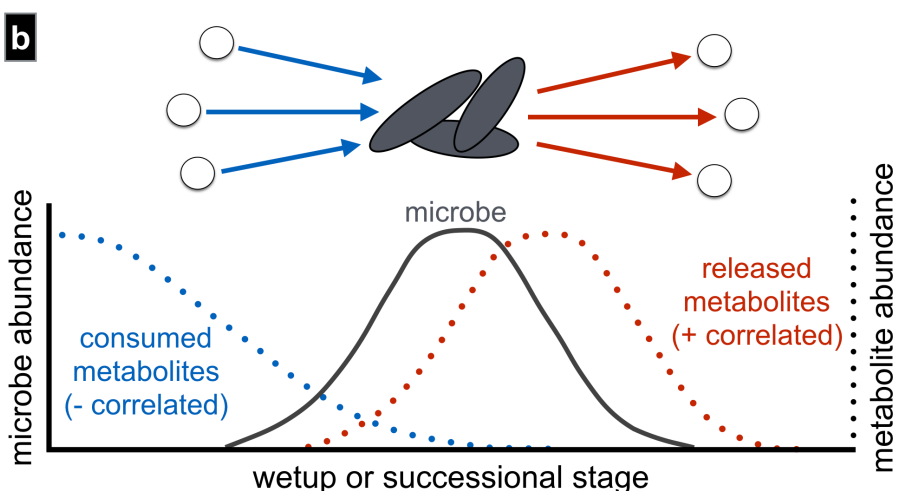

479

480 **Figure 1.**  
481 **A. Biocrust wetup metabolomics and metagenomics experimental setup and**  
482 **analysis.** To study microbe-metabolite relationships *in situ*, biocrusts from four  
483 successional stages were wetup and sampled at five time points. Biocrust soil water  
484 was removed and analyzed by liquid chromatography/ mass spectrometry and biocrust  
485 DNA was extracted for sequencing. Metagenome-estimated genome and metabolite  
486 abundances were analyzed through rank correlations to determine microbe-metabolite  
487 relationships and compared to the expected relationships based on isolate  
488 exometabolomic studies.  
489 **B. Exometabolomics-based *in situ* microbe-metabolite relationship prediction.**  
490 The hypothesis is that isolate exometabolomics can be used to predict microbe-  
491 metabolite patterns *in situ* based on microbial abundance: Across wetting and  
492 successional stages, microbes change in abundance and negatively correlate with  
493 metabolites that they consume and positively correlate with metabolites that they  
494 release (metabolites are indicated by dotted lines).

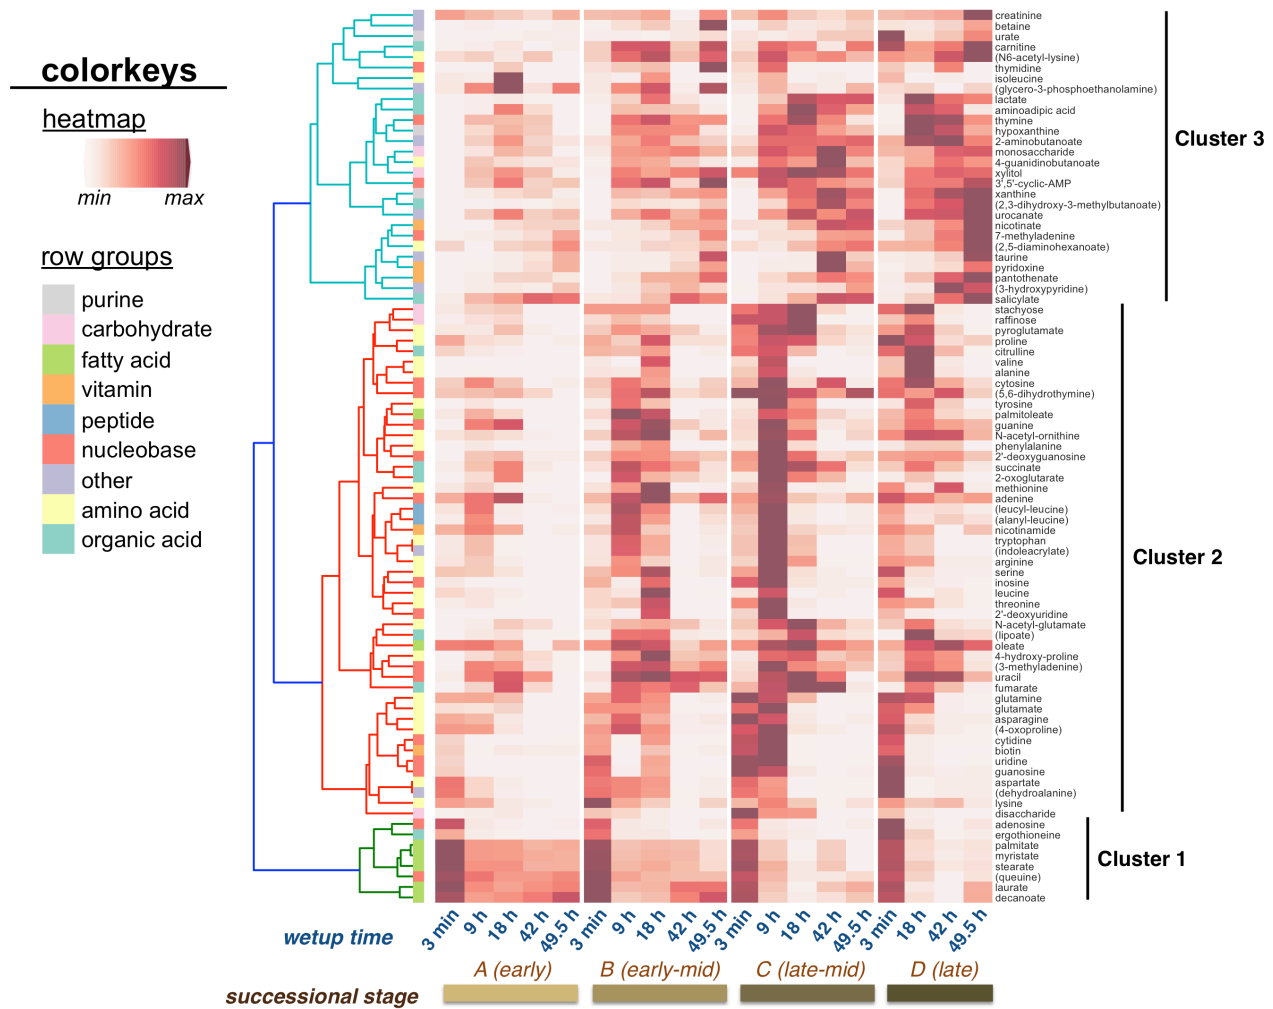

495  
496

497 **Figure 2. Metabolite patterns detected in biocrust soil water.** Metabolite cycling, for  
498 a total of 85 metabolites, was observed in biocrust soil water across wetting and  
499 successional stages. Unique patterns are indicated by cluster 1 (early metabolites, fatty  
500 acids), cluster 2 (early- to mid-time point metabolites) and cluster 3 (late metabolites).  
501 Putative metabolites are indicated by parentheses.

502  
503



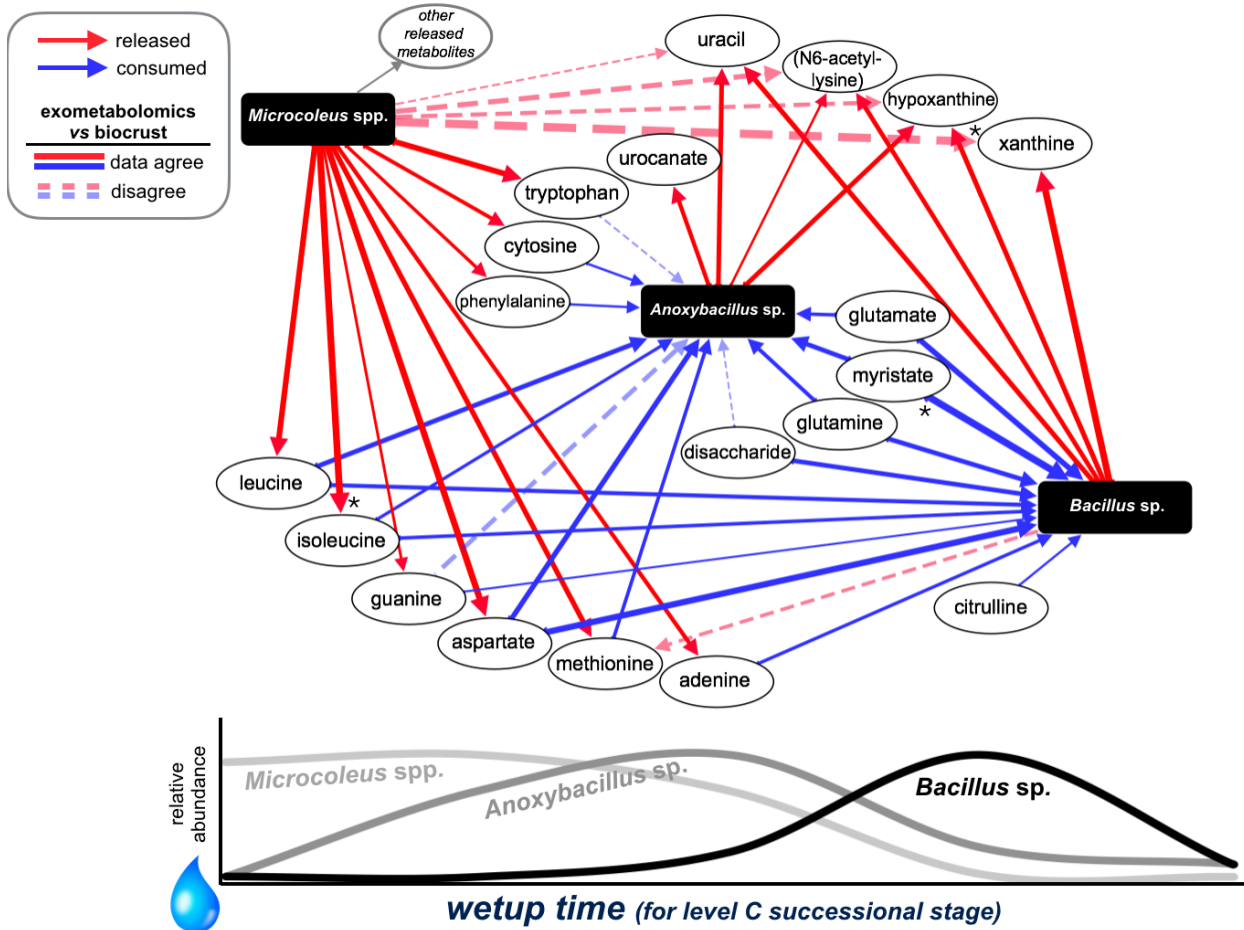

504  
505  
506  
507  
508  
509  
510  
511  
512  
513  
514  
515  
516  
517  
518  
519  
520  
521

**Figure 3. Simplified biocrust foodweb of three dominant bacteria based on exometabolomic patterns.** This network displays the relationships between metabolites and three dominant organisms as they increase and decrease across wetting and successional stages in biocrust. As *Microcoleus* spp. immediately increases in relative abundance during early time points, many released metabolites (based on exometabolomics) are positively correlated with *Microcoleus* spp. (solid red arrows) and as the two relatively-abundant *Bacilli* increase (first *Anoxybacillus* sp. then *Bacillus* sp.), consumed metabolites decrease and are negatively correlated with these bacteria (solid blue arrows) and released metabolites are positively correlated (solid red arrows). Dotted arrows indicate metabolites that are released (red) or consumed (blue) that did not display the expected correlation relationship with that organism. The thickness of the line corresponds to the absolute value of the Spearman's rho correlation coefficient. \* FDR < 0.05 for individual microbe-metabolite correlations. The expected directionality (solid lines versus dotted lines) was significant as determined by the exact binomial test ( $p < 1 \times 10^{-5}$ ).

522

| Isolate ID from <i>Baran et al</i> (2015) | Related Biocrust Organism                    | Taxonomy                                                                                                              | Percent Similarity <sup>a</sup> |
|-------------------------------------------|----------------------------------------------|-----------------------------------------------------------------------------------------------------------------------|---------------------------------|
| <i>M. vaginatus</i><br>PCC9802            | <i>Microcoleus</i> spp.<br>( <i>rpIO</i> 1)  | Cyanobacteria (p)/<br>Oscillatoriothrixaceae (c)/<br>Oscillatoriales (o)/<br>Microcoleus (f)                          | 92.0                            |
| D1B51                                     | <i>Anoxybacillus</i> sp.<br>( <i>rpIO</i> 2) | Firmicutes (p)/<br>Bacilli (c)/<br>Bacillales (o)/<br>Bacillaceae (f)/<br>Anoxybacillus (g)                           | 86.3                            |
| L2B47                                     | <i>Bacillus</i> sp.<br>( <i>rpIO</i> 60)     | Firmicutes (p)/<br>Bacilli (c)/<br>Bacillales (o)/<br>Bacillaceae (f)/<br>Bacillus (g)                                | 87.6                            |
| L1B44                                     | <i>Blastococcus</i> sp.<br>( <i>rpIO</i> 7)  | Actinobacteria (p)/<br>Actinobacteria (c)/<br>Geodermatophilales (o)/<br>Geodermatophilaceae<br>(f)/ Blastococcus (g) | 87.1                            |

523 <sup>a</sup>Similarity in *rpIO* sequence (isolate versus biocrust organism).

524

525 **Table 1.** Exometabolite-profiled isolates<sup>20</sup> and their closest phlotypes in biocrust.

526 REFERENCES

- 527 1. Paustian, K. *et al.* Climate-smart soils. *Nature* **532**, 49–57 (2016).  
528 2. Friedlingstein, P. *et al.* Climate–carbon cycle feedback analysis: Results from the C4MIP  
529 model intercomparison. *J. Climate* **19**, 3337–3353 (2006).  
530 3. Judd, K. E., Crump, B. C. & Kling, G. W. Variation in dissolved organic matter controls  
531 bacterial production and community composition. *Ecology* **87**, 2068–2079 (2006).  
532 4. Collins, S. L. *et al.* A multiscale, hierarchical model of pulse dynamics in arid-land  
533 ecosystems. *Annu. Rev. Ecol. Evol. Syst.* **45**, 397–419 (2014).  
534 5. Siciliano, S. D. *et al.* Soil fertility is associated with fungal and bacterial richness, whereas  
535 pH is associated with community composition in polar soil microbial communities. *Soil*  
536 *Biol. Biochem.* **78**, 10–20 (2014).  
537 6. Berthrong, S. T., Buckley, D. H. & Drinkwater, L. E. Agricultural management and labile  
538 carbon additions affect soil microbial community structure and interact with carbon and  
539 nitrogen cycling. *Microb. Ecol.* **66**, 158–170 (2013).  
540 7. Maestre, F. T. *et al.* Increasing aridity reduces soil microbial diversity and abundance in  
541 global drylands. *Proc Natl Acad Sci USA* **112**, 15684–15689 (2015).  
542 8. Barnard, R. L., Osborne, C. A. & Firestone, M. K. Responses of soil bacterial and fungal  
543 communities to extreme desiccation and rewetting. *ISME J* **7**, 2229–2241 (2013).  
544 9. Placella, S. A., Brodie, E. L. & Firestone, M. K. Rainfall-induced carbon dioxide pulses  
545 result from sequential resuscitation of phylogenetically clustered microbial groups. *Proc*  
546 *Natl Acad Sci USA* **109**, 10931–10936 (2012).  
547 10. Belnap, J., Weber, B. & Büdel, B. Biological Soil Crusts as an Organizing Principle in  
548 Drylands. in *Biological Soil Crusts: An Organizing Principle in Drylands* (eds. Weber, B.,  
549 Büdel, B. & Belnap, J.) 3–13 (Springer, 2016).  
550 11. Maestre, F. T. *et al.* Structure and functioning of dryland ecosystems in a changing world.  
551 *Annu. Rev. Ecol. Evol. Syst.* **47**, 215–237 (2016).  
552 12. Elbert, W. *et al.* Contribution of cryptogamic covers to the global cycles of carbon and  
553 nitrogen. *Nat. Geosci.* **5**, 459–462 (2012).  
554 13. Garcia-Pichel, F. & Pringault, O. Cyanobacteria track water in desert soils. *Nature* **413**,  
555 380–381 (2001).  
556 14. Baldock, J. A. & Nelson, P. N. Soil Organic Matter. in *Handbook of Soil Science* (ed.  
557 Sumner, M. E.) B25–B84 (CRC Press, 2000).  
558 15. Schmidt, M. W. I. *et al.* Persistence of soil organic matter as an ecosystem property.  
559 *Nature* **478**, 49–56 (2011).  
560 16. Kogel-Knabner, I. The macromolecular organic composition of plant and microbial  
561 residues as inputs to soil organic matter. *Soil Biol. Biochem.* **34**, 139–162 (2002).  
562 17. Swenson, T. L., Jenkins, S., Bowen, B. P. & Northen, T. R. Untargeted soil metabolomics  
563 methods for analysis of extractable organic matter. *Soil Biol. Biochem.* **80**, 189–198  
564 (2015).  
565 18. Warren, C. R. Comparison of methods for extraction of organic N monomers from soil  
566 microbial biomass. *Soil Biol. Biochem.* **81**, 67–76 (2015).  
567 19. Fierer, N. & Lennon, J. T. The generation and maintenance of diversity in microbial  
568 communities. *Am. J. Bot.* **98**, 439–448 (2011).  
569 20. Baran, R. *et al.* Exometabolite niche partitioning among sympatric soil bacteria. *Nat.*  
570 *Commun.* **6**, 1–9 (2015).

- 571 21. Silva, L. P. & Northen, T. R. Exometabolomics and MSI: deconstructing how cells  
572 interact to transform their small molecule environment. *Curr. Opin. Biotechnol.* **34**, 209–  
573 216 (2015).
- 574 22. Yutin, N., Puigbo, P., Koonin, E. V. & Wolf, Y. I. Phylogenomics of prokaryotic  
575 ribosomal proteins. *PLoS ONE* **7**, (2012).
- 576 23. Hug, L. A. *et al.* A new view of the tree of life. *Nat. Microbiol.* **1**, 1–6 (2016).
- 577 24. Wu, M. & Eisen, J. A. A simple, fast, and accurate method of phylogenomic inference.  
578 *Genome Biol.* **9**, R151 (2008).
- 579 25. Sharon, I. *et al.* Accurate, multi-kb reads resolve complex populations and detect rare  
580 microorganisms. *Genome Res.* **25**, 534–543 (2015).
- 581 26. Garcia-Pichel, F. & Wojciechowski, M. F. The Evolution of a Capacity to Build Supra-  
582 Cellular Ropes Enabled Filamentous Cyanobacteria to Colonize Highly Erodible  
583 Substrates. *PLoS ONE* **4**, e7801–6 (2009).
- 584 27. Rajeev, L. *et al.* Dynamic cyanobacterial response to hydration and dehydration in a desert  
585 biological soil crust. *ISME J* **7**, 2178–2191 (2013).
- 586 28. Walsh, A. M. *et al.* Microbial succession and flavor production in the fermented dairy  
587 beverage kefir. *mSystems* **1**, e00052–16 (2016).
- 588 29. Ding, J. *et al.* Integrated metagenomics and network analysis of soil microbial community  
589 of the forest timberline. *Sci. Rep.* **5**, 7994–10 (2015).
- 590 30. Trivedi, P. *et al.* Microbial regulation of the soil carbon cycle: Evidence from gene-  
591 enzyme relationships. *ISME J* **10**, 2593–2604 (2016).
- 592 31. Garcia-Pichel, F., Lopez-Cortes, A. & Nubel, U. Phylogenetic and morphological  
593 diversity of cyanobacteria in soil desert crusts from the Colorado Plateau. *Appl. Environ.*  
594 *Microbiol.* **67**, 1902–1910 (2001).
- 595 32. Angel, R. & Conrad, R. Elucidating the microbial resuscitation cascade in biological soil  
596 crusts following a simulated rain event. *Environ. Microbiol.* **15**, 2799–2815 (2013).
- 597 33. Nicholson, W. L., Munakata, N., Horneck, G., Melosh, H. J. & Setlow, P. Resistance of  
598 *Bacillus* endospores to extreme terrestrial and extraterrestrial environments. *Microbiol*  
599 *Mol Biol Rev* **64**, 548–572 (2000).
- 600 34. Nicholson, W. L. Roles of *Bacillus* endospores in the environment. *Cell. Mol. Life Sci.* **59**,  
601 410–416 (2002).
- 602 35. Pepe-Ranney, C. *et al.* Non-cyanobacterial diazotrophs mediate dinitrogen fixation in  
603 biological soil crusts during early crust formation. *ISME J* **10**, 287–298 (2016).
- 604 36. Hosoya, S., Lu, Z., Ozaki, Y., Takeuchi, M. & Sato, T. Cytological analysis of the mother  
605 cell death process during sporulation in *Bacillus subtilis*. *J. Bacteriol.* **189**, 2561–2565  
606 (2007).
- 607 37. Upton, A. C. & Nedwell, D. B. Nutritional flexibility of oligotrophic and copiotrophic  
608 antarctic bacteria with respect to organic substrates. *FEMS Microbiol Ecol* **62**, 1–6 (1989).
- 609 38. Garcia-Pichel, F., Loza, V., Marusenko, Y., Mateo, P. & Potrafka, R. M. Temperature  
610 drives the continental-scale distribution of key microbes in topsoil communities. *Science*  
611 **340**, 1574–1577 (2013).
- 612 39. Ferrenberg, S., Reed, S. C. & Belnap, J. Climate change and physical disturbance cause  
613 similar community shifts in biological soil crusts. *Proc Natl Acad Sci USA* **112**, 12116–  
614 12121 (2015).
- 615 40. Erbilgin, O. *et al.* Dynamic substrate preferences and predicted metabolic properties of a  
616 simple microbial consortium. *BMC Bioinformatics* accepted (2017).

- 617 41. Behrends, V., Ebbels, T. M. D., Williams, H. D. & Bundy, J. G. Time-resolved metabolic  
618 footprinting for nonlinear modeling of bacterial substrate utilization. *Appl. Environ.*  
619 *Microbiol.* **75**, 2453–2463 (2009).
- 620 42. Seth, E. C. & Taga, M. E. Nutrient cross-feeding in the microbial world. *Front Microbiol*  
621 **5**, 1–6 (2014).
- 622 43. Ponomarova, O. & Patil, K. R. Metabolic interactions in microbial communities:  
623 untangling the Gordian knot. *Curr. Opin. Microbiol.* **27**, 37–44 (2015).
- 624 44. Orsi, W. D. *et al.* Diverse, uncultivated bacteria and archaea underlying the cycling of  
625 dissolved protein in the ocean. *ISME J* **10**, 2158–2173 (2016).
- 626 45. Fike, D. A., Gammon, C. L., Ziebis, W. & Orphan, V. J. Micron-scale mapping of sulfur  
627 cycling across the oxycline of a cyanobacterial mat: a paired nanoSIMS and CARD-FISH  
628 approach. *ISME J* **2**, 749–759 (2008).
- 629 46. Woebken, D. *et al.* Revisiting N<sub>2</sub> fixation in Guerrero Negro intertidal microbial mats with  
630 a functional single-cell approach. *ISME J* **9**, 485–496 (2015).
- 631 47. Baran, R. *et al.* Metabolic footprinting of mutant libraries to map metabolite utilization to  
632 genotype. *ACS Chem. Biol.* **8**, 189–199 (2013).
- 633 48. Gougoulias, C., Clark, J. M. & Shaw, L. J. The role of soil microbes in the global carbon  
634 cycle: tracking the below-ground microbial processing of plant-derived carbon for  
635 manipulating carbon dynamics in agricultural systems. *J. Sci. Food Agric.* **94**, 2362–2371  
636 (2014).
- 637 49. Stuart, R. K. *et al.* Cyanobacterial reuse of extracellular organic carbon in microbial mats.  
638 *ISME J* **10**, 1240–1251 (2016).
- 639 50. Malmstrom, R. R., Kiene, R. P., Cottrell, M. T. & Kirchman, D. L. Contribution of  
640 SAR11 bacteria to dissolved dimethylsulfoniopropionate and amino acid uptake in the  
641 North Atlantic Ocean. *Appl. Environ. Microbiol.* **70**, 4129–4135 (2004).
- 642 51. Kaiser, M. *et al.* The influence of mineral characteristics on organic matter content,  
643 composition, and stability of topsoils under long-term arable and forest land use. *J.*  
644 *Geophys. Res.* **117**, G02018 (2012).
- 645 52. Swenson, T. L., Bowen, B. P., Nico, P. S. & Northen, T. R. Competitive sorption of  
646 microbial metabolites on an iron oxide mineral. *Soil Biol. Biochem.* **90**, 34–41 (2015).
- 647 53. Lv, J. *et al.* Molecular-scale investigation with ESI-FT-ICR-MS on fractionation of  
648 dissolved organic matter induced by adsorption on iron oxyhydroxides. *Environ. Sci.*  
649 *Technol.* **50**, 2328–2336 (2016).
- 650 54. Martiny, J. B. H., Jones, S. E., Lennon, J. T. & Martiny, A. C. Microbiomes in light of  
651 traits: A phylogenetic perspective. *Science* **350**, aac9323–1 (2015).
- 652 55. Diamond, S., Jun, D., Rubin, B. E. & Golden, S. S. The circadian oscillator in  
653 *Synechococcus elongatus* controls metabolite partitioning during diurnal growth. *Proc*  
654 *Natl Acad Sci USA* **112**, E1916–E1925 (2015).
- 655 56. Orth, J. D., Thiele, I. & Palsson, B. Ø. What is flux balance analysis? *Nat. Biotechnol.* **28**,  
656 245–248 (2010).
- 657 57. Allison, S. D. A trait-based approach for modelling microbial litter decomposition. *Ecol.*  
658 *Lett.* **15**, 1058–1070 (2012).
- 659 58. Zomorodi, A. R. & Maranas, C. D. OptCom: A multi-level optimization framework for  
660 the metabolic modeling and analysis of microbial communities. *PLoS Comput. Biol.* **8**,  
661 e1002363 (2012).
- 662 59. Yao, Y. *et al.* Analysis of Metabolomics Datasets with High-Performance Computing and

- 663 Metabolite Atlases. *Metabolites* **5**, 431–442 (2015).  
664 60. Smith, C. A. *et al.* METLIN: A metabolite mass spectral database. *Ther. Drug Monit.* **27**,  
665 747–751 (2005).  
666 61. Sumner, L. W. *et al.* Proposed minimum reporting standards for chemical analysis.  
667 *Metabolomics* **3**, 211–221 (2007).  
668
